# Supplementary material
Source: PubMed Central journal article supplement (PMC9936379)
Supplement: jama-e230169-s002.pdf [file jama-e230169-s002.pdf]

## **Data Sharing Statement**

### **Data**

**Data available:** No
